# Supplementary material for: Whole-Transcriptome Sequencing-Based Analysis of DAZL and Its Interacting Genes during Germ Cells Specification and Zygotic Genome Activation in Chickens
Source: MDPI journal article supplement (doi:10.3390/ijms21218170), 2020-10-31
Supplement: s1 [file s1]

**>DAZL, NM\_204218**

UGAACAAAGACUUGAAGUACAUAAAUUGUAUUACUUUGAUGUUCUACAGUUCAGUUUAGUAAGAUGUGUAGUAAAAAGUGUAACCUUGUUCAAAAA  
GUUGCUUCAAGUUGAUGUUUUGUUUUGUUUUAACCUUGUUCAGAAUAGCUAUUUUUGCUUGAGAAGUUUGAAGUUGUAGAGUUUAAAAUAAUUCAG  
GUUUUAUUACUAGCUUGCAGUUCUUUUCUGCUAACUACUGAAAUGCUAAUCUUAAGGAAUUUAUAUUGGGGAAGGGGAAAAAGAAAAACACUUUGU  
UUGGUAUGUGUGGAUUUUUCUUCUGAGCUUUAAAGGUACAGUUUGUUGCAUGUUA AAAUUUAGUUCUUAUUAACCACAACUUUAAGUUACUACGUGA  
ACCGAUUACCUUCUUGCAGUUCAAAAGUUGAAGCAGUUCUUGUCCAAGAUUGGAGUAUUUUAAAACUGAGCUCUUAUACAGUGGAACAGAGACGUGA  
CGGUGUAACUCAACUGAAGCCUUUAAGUCCCGGUUCUUAAGACUACCUAAUACUAGUUCUUUGUUU GCUAACGACAGUUCUUAUGUGAAUCCU  
AAAAUUCUAUAUGUAACUUAAGAUAGCAAGAAUGUAAUUAUACAUUGGCUUCAGUGGAGUAUGACUUUUUUUUUUUACUGGAUUAAUUUAGCA  
AUACCUGUAUCUUAAAUUGUGAGAAAAUACUGCAUUUAAAUAUGCCUACUUCUUGACGCAUAUUGUUA AUCAAAGAAUACUGUAAGCAUUAUU  
UAAAAUAUUUAUGUAGAUUUUAGUCAUGUAUUUUGAAACAAUAAAAUUUUUAAUUUUGACU

**>DND1, XM\_015293536**

GGGUGCAUGUGGGCACACGUUGUGCCCCAGCUAUGAAAUGAACCCGAGCCACCUGAUGUCACGUCUGGAGCAGAGCUGAGCCACGGGGGCCGCGU  
UCCUGUUCAGCCUUGUUUGAGUUUCGUUGGGUUUGUUUGAAGGCCAUCUGGAGGAUGCGGGCGCUGCCCCAUCCCUAUCAGCACUGGUUCUGUUUGU  
UGGCAGCAGGCUGGCCUGCCUGCUUCCAUUGUUCUCCUGUUGAUGAAGUUGUUUUGUGUUCGCGGUGCUGCAGGGCUCUCAGGAGGAGCAGCAGC  
UGCCUGGGAAGGAUGCGUUUGGGGGCCCGGGCCCAUUGCCUGCAGCCCAUUGUGCGCCGUGGGGCGAGCCAGGGAGCCUUGGAGUUAUUUAGGC  
ACUGCCCCCAGCCUGGAGGCCAGAGUCCACCUGCGCUAUAUAAAGGAGCCUGGGAAGCACCCGGUGUGUUCUGUUGCGUUUUGUUGCUGCGGUUC  
CCUGGGUGGGUCCCGUUGUGCAGCCAGGCCACAUGGGCAGCACCCCGUAGCGUCACCCCAACGUCACCUCCACACGCGAGCUCUGAGGGCACAGCU  
GCGGCCACCCGCCUGGGCCGGCUUAGCCCAGCGGUUCUUCGGCAAACAGUUUCUGAGUUGCGGGCCCCGACUGGGGUUCGAUCCCGGGGCGACC  
CCUGGCCCAUUU

**>STRA8, XM\_015289566**

GUAGUUUCCCUGUUUGUCAUUGUUUUGCCAAGCAUCACUGGAUACAGCAGGCAUGUGAAGAGAUUAUGCCUCUUCAGAGGAACACCUCUCCAAUCA  
GAUUGGGGAGACACUUGUGUUGGUUUUGUUUAUGUUCAUUCUCCUUAAGUGCUUCAUAACUUAUCAGUUGAGCAUUUAUACUUUUAAC  
GUUCCAGGUUAAAAUAUUUAUAAAACCUAAAGGAAGAAUUAUUUUCUCUCUGACUUUUAAUGCUUAACCUCAUUUCACAAAUACACUGAAGCAC  
GUGCAGUUGUGUACCUUGCCUUAAGGUGAGCUGUGGAAGAGAUAGCAGAGAGGCAUGGCAACCUACGCGCUCACAGCUGCUACCUUGCAAAACUCACA  
GCGUGCCUCCAGCAUCCUGGCAGUGAAUGCUUUCUCUACAGUUCUUUAGCCUGGGCUGGAAACAACAGAGGAAUUUCUUCACAGAGAGCGCAUG  
AGGCUUUCCGUUAUCUAGGAGCCCAACUGUAGUGGGCCACCACUCCCAAAUCGUUGAGAGAUAGCAAGUACAACACAAACUGGGAUUUAUUUUG  
UAAAGUGUGUAAAGCUGAAGAGAAACAAGCCCCUGUGCUGUUCUGCUGCAUCUUGUUCUUUGAUGAGUAGUACUGCUCAGAUUGGUGUCUUGAAU  
UAAAAUUGCUGUGAAGUUAAAACAGAUCAUUCACAUCUCUGAGCUGUCAUUAAGCAGCUUUCUGCAGACUCAGACAGUGUUCUGGCAGUGGUUAUAUU  
GAGGUCCCCUCCUCCACUUCUCCUUCUCAUUUUAAGUACCAUGUAUAUAUUGCUCUGGAGGGCCUGGGUUUUGGGUCACGUGAUGCUUGAAACAUG  
UAUAGGUUUUACAGGGGAUCUGAGGUCAAUCAUUCUUUCCUAAAGGAAGGAAAAACAAGAGACAAUUGUGUAAAUGUUUGC

**>DDX4, NM\_204708**

AGCAAAUUUAGCACUAAACUCUGUUGUAUUCUGUUGUGGUUUUAGUGAACUGUUGCAGUUAUUGUUUAAUUAUCUGUUAAGUUUUUGAAAUGCUUUG  
UGUUUACAAGCUACCUUGUAUUCUAGUUGGCCUUUCAAACAUGAAAAAGGAACCCAUCGUUGAUUCUCACUCAGUGUAGGAAGGCAAAAGCCAUU  
UUCAGGAAAAAAAGCCUGAAACUAAGUGUUA AAUGUUU CAGUCAGUAGGUGUUUACUGAUGCUUAUAUGUUA CUACAAAUAAUGUGUUGCUAUAUA  
AGAGUGAGUUGUCAUCCUUGUUUGCUUGCAAGUGGAAAAUAGCAUAUCACUUGAACUUAUAUACUUUGUUAUUAUUUUCAGUUAAUUGCAACUUG  
GAAGCAGUGUAUGUAUUCAGUGCCCUGGACAGCAUGACUCCUUUUCUUGACAAUUUCCCGAGGAUUUGUGUAUCCAUAUAGACUUCAGGUCAGAAG  
GUUGGGUUGUUGUUAUUGUGUAGGAAUACGUAGUAGUAAUUCUGGAGGGAGAUAGUACACUUGAAGUCUUCCGUGUUCUCCGUGUAGUGAAAG  
CAACCAGAGUAACUGCAGUCAUGGGUCAUCUGUAUCCUAAGAAAAAGCCUUCGAAGGGGGCUGACUUAUCCUUGUUUCGAGGAUCACUUCAAUCACA  
GGGUGCUUU

**>NANOS3, XM\_025145794**

CGGGACGCAGGCUGUGCUGAGCGCUCUCCUGGGACACCAAAGAGCCGGCAGUGGGUGUGCAGUCACUUGUGCAAGAUCACUUGUGCACCAUCAGUU  
AGAUGUGCACCUGCAGUUGUGCACCAUCACUUAAGAUGCGCACCAUCAGCAGCUGCUUGUGCACCAUCUGGCAGCAAUUGUGCACCAUCUGGUUGUGCACC  
AUCGGCACAAACAACCGCCGGGCCCCACGCUUGGGGUGCUGUUGGUUGGGUGGACGGAAUCUGUUGUGGGGUGGGGGGCACUUGUUGUGUUGGUGU  
CACACGGGGGCUUUUUGUUGUGUGUCCUCCUGGUGUACACGGGGUGCAGCGGUGUGUGUUGUGUUGGUGUUUGGUGUUAACGGGGGCACUUGUUGUGUUG  
UGUUGGUGUCACACGGGGGCACUUGUUGUGUUGUUGUCACACGAGGGCUCUUGUUGUGCUGUGUCCUCCUGGUGUCACCCGGGGUCACUGCUGU  
GUUGUGUUGGUGUUAACGGGGGCACUUGUUGUGUUGUUGUGUGUCACACGAGGGCUCUUGUUGUGCUGUGUCCUCCUGGUGUCACCCGGGCAGU  
CACCGCUGUGUUGUGUUGGUGUCACACGGGGUCACACUCUGGUGUUGGUGUCACCCGGGAUCACUGCUGUGUUUGGUGUCACACGGGGUCACA  
CUCUGGGUUGUGUUGUACCUUGUGGUCACCGCUGUGUUUUGUUGGUGUACACGGGGUCACACUCUGGUGUUGGUGUACCUUGGUGUACCGCUGUGU  
UGUUGGUGUCACACGGGGUCACACUCUGGUGUUGGUGUCACCUUGGUGUACCGCUGUGUUUGGUGUCACACGGGGUCACACUCUGGUGUUG  
GUGUACCUUGUGGUCACCGCUGUGUUGUGUUGGUGUCACACGGGGUCACACUCUGGUGUGCGGUGCCCCCCCCGUGUCCAGGGGUGGUUUUAUUGGGC  
CGCUGCAGGUUUUGGUGCCCCCAAUAAAGACUUAACAGCCGUCGGCGCUGCUUA

**>SYCP3, XM\_004937837**

UGGCUCAAUGGAGAAACAACUUGUACCUAAGUAACACGAUACAAGUAUAGGCGUUAGCCAUGAAGAAGUUAUCUUAAGAUUUAAAGUAAGUGUUUUA  
AGUUCCUAUAUAAUACUUAUUGGAUUUGUCUAAUCUUGUGUCUGAUAAUGUUGUAAGAGGUUAUAUAGUAAAUUCGUUACUAAAGGGGAAAAAAC  
CCAAACCAAUUAUGGUCUGUCCAUAUAUUAUUACUUUACUUAAGCAGUGGAGUGUCCAUAUGUUUACUUUUUAUAUACUAGUUGAAACAAUAGG  
UAGAAUUAAUGAAUAAAGAGACAGAUUUUGCAUUAAGUAACUUAUGGUGUACGUAAGUAGAGCCUUUUUACAAAGACCUUUAUUAUUAUUAUUA  
GACUUCUUAUGUUUAACACAUAGCCUCUAGACCUGUCAGCAGUUAAGUUCACGGAUUAUGAAAGGUGGUUUAUGAUGUAUGGUAUGGUAUUAUGA  
AACGUGAGGCCUUCUGUCAGGUUAGUCAUUGUGAUUUCUUUUACAAUAAAGAGAGAUUAACUUGCUGUAACUUGUCCAAAAAGCAAGUUUCUUUA  
UUGAAUAUAGAGCUUAGUACACAGCUUUAACAGGACAUCUGCUCAAGUAAGCAUUAUAGAAUUAUACUGCAUGCAUUUUGGUUAUAUAUUUCUGUA  
CACCUUGUUGAGGUUAUCUAUCUCACUUAACUUGAAUUGAAUAUUAAGUCUUGUAGUUUCAAUAGACUAGCAGUUCAGGGAGGUCUGUUUUAAGAA  
UAAAGCAUUUUCAUUUA

**>PUM2, NM\_001039292**

AAGGCAAAAAAAGAAAGGAAGUGGAAGAAAAAUUUUUAUUGUGAAUGAUCAAAACAUACAACUUAACUAAAAUGUUCUGAUUUUUUUAUUCUUAU  
UAUUGACUUUGUUCUCCAUUUGUA

>PRDM14, XM 025147991

[illegible]

>DZIP1, XM 015274761

UAGUUAUAUUUGUGUUGGGAGGCGUCGUUUUUGGUUUCUAUUGAGUGUGAAAAUGUAAUUGAAAUCAUCGAGUGUUUCCUGCUCAUUUUCUAUGCU  
GUUCAAGUGACAACAUAUGAAUACUGUUUACAGAGCUCCUGUGUCUUUUAGCCUGAGUUUGUACAAAGAAUUUUCAUUAGCACAUCGCUUGGCCAUA  
GAAUUUGGAAACCAAGAAAAUUGUUCUCCUGUGAAGUCAGUGUGGAAAAUCCUGUAUUUUCACUGAGGUGAAGAUUUUGCCUCUAUUGUUUACUUU  
UAAGCAACAAACUGGUUAUAGAGAAACACUGUUCACAGUGAACAGAAUUUACUGCAGAGUAUUACUUUAUAGAAUUUUUUAAUGCAUAUUUUUCU  
UGUAUUUUUAUCAAAACUUUAUAGAAAAUGGUGAGCAUUUUAAAUAAGACUGUUUCCAUGUAUUCAAUUGUUUAACAUGGUUUAACAUAUAAA  
CGCCAAAGGGGAAAAAAAGGCCUCAUAAUAAAAGUUACUACUAAAUGUCUCCUAUUUUUGAAGUCACCCUUUUUCCCGCUAUUAGAAUUAACUCU  
UAGUUAAACUAAAAAGCAAAAAAGAAAGAAUAAAAACAUUCAUCUGUUUUAAGGAAAAUUAUGACCUUUAAUUGAGCGCAUACAUCCAU  
ACUUGUUUGUGGCCACUUAUCUAGAAAAACACAGUGAGGGUUUGACUUAAGUCAAAGCAAAUAAAAGACCAUGAAUGACUUUGUAAUCCA  
AUGUAUUUUAGGUGGUGUCAGAUUAAAAUUUUUCUGUGUUGCUGGCCAUUAUAAUAAUUGGACUAUACUACUGUUUUGUUUUUA

>TDRD7, NM 001305104

UCGCCGCUUCUGAAACGUAAGCAGCUCAGAUUCUGUAGCAAUAAAGUAAUAGGCUUCAAGAGAGAUUUAAACUGUUCUUGUAUUGCCUUGAAGAGAAU  
AAGGGGAUAAACUUCAAAAGCAGUGUUCUGUGAAAAAGAUUCGCUUAAACAAGUUUGCUUUCUGUUGACUUCAGUUGACUUUAUGAAGUUUUGCACU  
UUGUUUACUACUGAAUACUAGACCGUUUGGGUGGAAUACUAAAAAGUUAUUUAUCAUAAAAACAGUCGCGAACUAUU

>*PUM1*, NM 001012840

GGCACGGAGCUGCCCCGGCCAUCCGGCAUCCACAACCAGCAACCAGCCCCUAUCCCUAUAUACAGUUAGAGAGCGCGUACGGUUGCUAAACUACUAA  
AAGAAAGAAGAAAGAAAAAGCCUUUGUAAAAGUUUUUUUUUAUUGCAUAAACAUGUACUAAUUUUUUUUUUUUUUAUACGUAUUGCCCGCUGU  
UUCUGGUUGUUAAGAAUACUUGUACAAUGGUCAUCAUGUACAUGGAAGGCCAUAUUUUUGUUCUUGUUGUACUUAUUAUCCAAAGUGGGAAAC  
UUCAGGGUGGUUGGUUUUGAAGUACAAGAAAAACACACGACGUUUUUUAUCCAUUCUGCCUUGCAGGCCAACUCUGUGCAGAUACCCGUUGUUCUCU  
CUGACUCAGAAGUCAGCAGCAGGUUUGGAUUUUAGUUGAACGGCGCGAGAGACGCAUUUAUUGCUGUUUAUAAAAGAAAAAAGAAAAA  
AAA

>POUV, NM 001309372 (3' UTR is not known)

>NANOG, NM 001146142 (3' UTR is not known)

>NANOS1, XM 025151916

GAGCGGGGCGCGCGGGGACUGGCGGGCGGCUUCGCGCGGGGACGCCCUGAACCCUUCUCCUUCUCCCCAUCUCUUCUCGAUCUUUGAUGCUGACGGGGAGCAGAAGCUGGAGGAGCAGCAGGGGCAGGAGCUGACCGCCGAACUGUUUCACGUUCUUCUCCCCACGUUCCUCUCCUUAUCGUCUGCACGCCCAUGAGCUUGCUACAAAAA

>PRDM1, XM 004940353

GACUUUUUGGCAAGUGAUUUUUUUAUUUAUGACUUGGCAAGUCAGGGUGCCUGUAGCAGAUUGCUUGUACAUAAGUUUCAAUGCUGCAAAGCAAUCUU  
GGCUUACAGUAGUUUCCCUACGCUCUCCAGCUGAAAGAAGGAACUCCAAAGUUACUGUUUUCUCAGGGCAUAAAAAGAGGCCAAAGGACUGCGUGUUG  
CCUCGCCAGUUACAACAAAGACAUCUACUCCAUAUUUAUUUUUACAUGAUGAUUACAUAUUUAUUAUGCAAUUUAUUAUCAAUUAAAAGCAA  
AAUUGACAAAAUGUUUACAAGUAGCGGAAAUUCAUUGUAAUUUUUACUUUAAGUGUUUUAUUUUUUGUUUUAUGGCCAUUCUUCUAUUGAGUUUUU  
UUUCGCACAUCUGUUUUAAGAACCUAAGAUGUGGGUUUCAGUAACCAUGUUUUAUGUACCAAGUCUUUUUAAACAAAUUGUGUUUUUUUCUAUUUGCC  
AAAGUUGGACAUCUGACAUCAGAAUCCUAGAUCAGUCAGACUGAAAAAAUUGCGGGUACUUUAUGUGCAAUACCCCCAUUGGGAUCGAAAGGA  
GAAGAAAAAAAAGAAAAGGUAGCAGCAAGCAGAGAAGAAACUGUGCCCCGGCCUCUCUGAGGGCAGGAGAGGUUCUUCUACUCGACGUCUACCC  
AGAACAAGUUGACACAGCAACCAACUCUGGACUGGACGAUACCGUAGGUUUUAAGGAACACAGCUAUAGGCCCAACCCUUGUCACAUAAUUUAUGACCA  
AAGGAACGCAUCAGCUUAAGUGGUCUUCUCCAAAUAAUUAUACCAUACAGCUUUUGUUUUCCAACCGGUUUUAAGAGCAACACCAAAUUAUC  
UUAAUUAUUCGCCUCAAGGGAGAUUUUUCGCGAGAAUUCUUUUUUUUCUCCCUUUUUUCUGUUUUUGUUUUUUUUGGCCAGAGCCUUCACAGGAUA

CAAGUUAUUCUCAGUGCAUUAACAUAUGAAAUUAUACAACAAGGCCAAUUUAUGAGAAGCUUUCUGCUGAUAUAAUGCCUUUGUUGUAUAUCGGUGU  
GGUAUUGGGGAUAAAAGACUACUUAAGCAUCCUAAAGAAUAUGUGAGAUUUUUUAUUGCUACUAUUUGAAUUAAGAACUUCUGAAUACCUUUUGUGU  
UUUUAUUAUGAAAAGAGGUACAGGGUUUUUACCGUACAGUGCAUUCUAUUGCCUUCUUUGAAGAAGGUUAGCCUUUUAAAAUGUUUACGCAUAGG  
AAGAAUUUUUGUGUUUUUUUUUUUUUAUACAGAUUGGCCAUUAACCUAUGAGUAUAAUUAUUGAGGCCUUUGUGUUAGACUAUUUUUAAGUUUGUUU  
UAUAAUAUCGCAAUCCGCCUUUGUGUUUAAUUUAACAUAUGAUGAGUUUGCGUUGUUUGUAGAAGCAUUUUGAAGUUUAACUUAUUUUUAUAAAGUUA

AGACGUGGAGUCCUAUGAUUUCUUUUAUUAUGAUCUCCCAUGUGCUAAAAUGCCAUAGUCCUGCAUCCCAAGGAUUUUUAUGAAAAACAGUGUGU  
AGAUCUGCUCUCAUUUCAGAUUGCAGACGGUUUGACUUAAGAUGCGCACCGGAGUGAUGUUUUUGUAACUGGUCUGUUUUUGGUUUUGUUUUUCCCGU  
UGAAAUAACAUGAAGCUGGUUUUAUGUAUGGAAA

UUGCAGGCGGCAGGGAGGGCUAACACCAGGAUGGAGAGGCUUUGGCAAGGCAAACGGGGAGGGAUGAGGGCAGAACCUUAUUCUUAUAAAGCCCGGCUUUAUUGGGAUGGCCAAAAUAGGAGGGGGAGCAUCCACACACACUCCCGGACAAAAACAAAUAAAUAAAUUUGGUUACUCUUUUCUCAGGAAGCUGAGGAGGAGGAGCAGGAGGACAGCUCAGGAGGCGUCUGGCGGCUCCUUGCUCUUCGCCCCUGGCGGAGCAGGGAAGAGCAGGGGUGCGAGGCUUGGGGGAUUGCCCGCAGGCGCGGCCCAUGGCCCAACAGCUCUGGCGUCUGAACAACAGGGGUGGAAGGUCUCUUUUUACCAACAAGAGUAGCACAUGGCUCAGUGGAGCUCAGCCUUCUGCGUGGAUCAAAACCCACGUGGGACAAACACUGCUGCUCUCCUCCUGCUCACGCUGCACCAGAACCUGGGCUAAGCCUCCCAUGGGUACAGGAAAAACAGGGACCUUGGGGUGGCAGUGGCUGCCCUCAUCCCUCCCAAGCCUUGCCUUUAUUUAUUGGCCCAAGUGACAGCCCUUCUUCUGGGGCCGGAUGCCCCGAUUGUGCCAAAGCCAAUGCCAAGUGAAAGCUGCACUAGGAUGUGCGUGAAUGACGUUUCUUGGGUUUUUUUUUUUUUUUUUUUUUGCUUUUUUAUAUAAUAUUCAGUUUUUGUAUUUUUGUAUAUUUUAAUUCUUUAAAAA

AACCAUGGAUGGAUUCAGGGCCAGCGCGGAGGUAGAACUGUGUUUACAGCUGACUGUUAAAAAUCUGAGUUUGAAUUGUGGCCAUUAGUGGUUAAUAG  
 AUACAUAUUUACCUUUAAAAAAAGCAUUUUCUUCAGUAUUUGCUUGUUUGUUCUGUUGCCUUGAGAUGAAUGUA AAAACACCAUUA  
 CUGAGCAUAAGACCUCUGUUUUUUUUUUAGAGAAGAAUUGUUUAGUUUAUCCUGGACUGCAUACACUGGAUUGAACUCGAGACCCUUACAG  
 UCUCUUUUUUUAGUUGCAGCUGCUUGUUUACAUUCAGGUGAGAUUUUUACUUUUUGAAAAAAAAGCAACAAAGAAUACAGUAUUGCGAAUUAUG  
 GCUGUUGCUUUUCUGACUUUUGCAAUAACUGUCAUACAUCCGUUGUCCACUGUAGCAUUAUGAAAAUAGUCAAUUACAAAAGCUCAGCUAUC  
 AGGUUUGAUGUACCCUGGAAGAAAUUCCCAAGGCAUUUUGCCCCAUACAAAAGGGGAAGAAUAAAACAGGUGUGAGGCAGCUGCCAGACGAGUAAC  
 AGCCUUGAAAAAAAGCAUCUUCUAUAGUUUGAGUAGAGAAGACUUAUAUUGUAGUGGCCUAGUCAUCCAGUGGUGGUAACUGCUGCUUACUC  
 UAAGAAGGAUAAUAGUUGGUUACGAACAAGUUGAGGUCUAGAUCUUAUACUGGCCUAGUUGGCACAUGGUGUUUACUGAUGAGCUUUA  
 UCUGUUUUGGCGCGCUCUGCAUUAUUUCUGUAUUAUACAGCACUCCUGCAGUCUACAUGGCUGUUAAAUACUUUAGCCUUUGUGAUGUGUUG  
 CUAUACAGUGCUUGUUGCACACAACAGUUGAGUUUACUACAUAAGGAAGGAUAGACCUAUGCAAACAGUAUAGAGUUAUAGGGGAAACACA  
 ACAGUGCAUAAAUGUGCCACCCAGCUGUAGACAAGGUUUUACGAAUAGUUGUAUUGGACCCUAGGCCAUUAAUUAAGUUAUUUACUCUGAAC  
 AUAAUCCACGAGUAAGCUUAUUUCCUUGUAUUUAUGUAUUAGGCACAGCAGCUUUUUAUUGGUGUGAAGGAUAAACAGGAGUACGACUUUGAGU  
GUUUUCCAGGGAUCUUUGAACCGCAGUCACGCGAUAUAGAGAAUGUUUUGUUUUUUUAACAAUUUAACAGAACCUUGGUUGAAUUAUAAA  
 AUACAGUAAAGAAUGAACAAUUAUGAAAGGAAGGAAAAAGCUACUAGUGGUAGCUACUACAUGGAUUGGUCCAUUUGGCUUUAAGUAUUUCUAGAG  
 UUUUAUCAUCAGAGAUGUUCUAACUUCAUUACACACCAUGAAUAAAACAGGGUAAAUUGUCAAAAGACUGUUCUCAGUCAUUUGGGGCCCCAG  
 ACCUGAUGCAGUAUCCGACUGGUGGUUUCAGAAGGGCAAUAUAGAGGGGGCAAUUAACCCACCCUUUCCUGCUGGCCUCUCCUUUUUAUGGAC  
 CCCAGGAUCAGCAGGCUUUCUGGGCUGAACACACUCCUGGCGUCACUUAAGUUUUUACCUUACCAAGACCCUGAGCCUUCUUCAGCAGGGC  
 UACUCUUAAGGAUUUCUUCUCCGAGUCUUUACAUACUCCUGGUUGGUCUACAACAAGUGCAACCUUGCAGCUUGGCUUGGUUAUCUGAUUAA  
 GUUUACGUGAGCCUACACAAGUACACUGAGAAUAAACCGACCUGACUUAUAAAGACAGAAGCGAAGAAGGCAGUGAGAAUUUCAGCUGUUUCCUUGUC  
 UUUCCUUGUCUCAGUGAAUUGUUUCCCACCAUUCGUUAAUACAGUGAUGGAUGGCUGCAUGCCAAUUAUGUAGCCAAUAAAAUUAACCUUUA  
 AAUACAGGUUUUAUGGUAUCUUAAGGAGACUUAUAAAACUUAUUAAGAGAAUAGGUAUGAAAGAGGCAGGCUUGAGGAUGCCUUUGAAAAUCCAG  
 AUACGAGUAAUUUACAGGAAUAGAGAGGUCUAUCCUGCAACAAGCCCCAGCACACCAGUAUGGUAUUUUGGUAUCCAUAUAAACUCCUGGU  
 GGCCUC..... (truncated)

GACAAAGGGCGCGGGGGGCGGGGUGGGGGGGGAAGGAGAACAACAAAACAAACAACAACAACAAAAACUUUUAUUGAAAUUCU  
GGACCUUUUUUUUUUCUUUUUUUUUUUUUUUGGACUAUUUUUGUACAGAGAAAACGGGGGGGGGGGGGGGG

GUGGCAUCUGGAAGAAGAGGAGGCCAGCUGUACUUGCUGUUUGUAUUGUGUAGGGGGUGAGAGAGGGAGGACUUCUAUUUCUUUUACUUUACUCACUACUACUACACACUGUAGCUGAAAAUGUUGUUGUAUACUGUCCUUUACCACACACUGUUAACACUAUAAACUUAUUGUGCUGAGCACGGUACAGGCAUCAUUGCAAUGUUUACUGAAGCUGUAUAUUAUUUCUUAUUAUUGUGUAUUGCAGUAGAGAGGCCAGCAUCUGAAGAGAAGAACAAAAAACACAAAGAUAACCCUGGGCCAGGGUGUAGAAUGAGUAGUACUAUUGACUUAUUGCAGCGGUCUUCUGAUAUCUGGGAAGCGUGUAGCAUUUCCAGUUAUUUUGUUUGUUUAGAUAUAAACAGAUUAUAAAGCAAAGUGCUGUUGCAUACCCUUUCCAUAUCCAGGCCACACUGAGAGUCUUCCCCGGCAGACAGCUGCAGGUUGGAGGCCAGGAGGGACAGACAGUGCGUCCUGGGCAAGAAGUGGAAGCCAAGGGAUGGCACUGGGCAUACAACAGAGAACUUCAGACACUUCUGGGGCAUGAGGCAGAUUGGAAGGGAAGACCUAGUCUUUAUUUCCUACUCUGGGCAGUCAGAGAGAGAGAGAGUCAGUAGGUUUUCUGUGGGUCGCCACCAUCCCAUCUGGCAGACCGGAGCAUCCACCGCAGUCAGAAUUCGCAGGAUGAGAGUCUUGUUUGCUUAAGAGCUGAUGUCCAAAGCAUUCACAAAGAUAGUGGGCUCUGCAGCUGGUCAAUAGCAGGAGGAGGUUGCUUACAGUAAUGGAGUGUCAGAGGAGCAGAGGCCGUUUAACGAGACAUCUUAUUCUUGGCAGGAGCAGAAGCAAAAAUUCUAUCCUGAGGGCCUUUGCUUAUCUUAUGAUUAGCAGUGAAUAUUUUCCACAGGCUGGCUGGAUAUAGUCUCUCAGGAAAGGGCUCUUCUCCCAAGUCAUUUACAUCUUUUAUUCUCUGUAGUGGUGCUGAGAUCACAGAGAAGAACUUCACUGGGAAGCAUGGAAUUUUUUAUGGAAUAGAACAAGUUAUACCUUCGUGUCUGUUUGGAGGAGCAUAUAGAGCGGUGGGGUCAGUUUCUGGGCCUGGAUUGUGCUUAAGUAUCUUAUAAUUCUUUCUUGGAAACACUGUGGUUCUUUUUUUUUUUUUUUAACCCUUGUUCUGUGCCUUUAAAUAGUAAUAGCUGCAAGGAGCAUUUUUACAGACAGAGAACAGGUUAAGUACCUUAUUUAUUUAACAUUGCACUUAAGCACUCUGUAACUUAUGUUUACAGGAUUAUUGGUUGAGUUUAUCAUGCAUUUUAAUUGUGUAACUAAACUGCCCAAAUGCAAGACGAUUGUAAUAACACACACUGUGAGUACAUUUAUGUAGUGUAAUACCAACUCUUUAUUGCCUGUGCAUUUGGUUUUAUGUUUACAGGAUUUAUUCUUAUCUUCAGAGUUAGUCGAGAAGUAGCCAUUUUGCAGUAGCAUUCUAGGCUGUGCACCUUUCCAAAGUAGCCAGUUGUUUUGGAGGCACUUUAUGCAUUCUGUUGUUGAGCAUUUUCAGUUUAUAGCUAAUAAAGCUCUUUCUAGUGUGUGGCUUUACAGACAAUCUGUAGCAACUAGUUUUUAUAUAGAUAGUUCUUGGUACAUUUAUGGACAUUUAGCUGAAAAAAGUUUGGGUUUUUUCUUCUUUAUUUAUUUUUAUUUUUUGGGGGGGUUGAAACUUAUUUUGCAAUGGCCUUAGUGUUUGAAUGGUUUUAUGCAUUGUUUUGUAAAUAUGGAAUUGUAGCAAUAUUGCCUUUUGACUAUUCUACAGUCCUUGAGUCUCAAUAUUUUUAUAUAUAUAUAUAGCAAAAAACUAUAUGUAUAAUAUAGUAAGUGUCAAAGUUUAUGAAACACUUAUGGAUAGUGUGUCUGUGUAGAAUAGACUUCAGAGAGUCAAUAUAAUAAUCUGUAAAUAUGUAUUCAGAUCCGAUGUGUACUAUGUUAAGAUGGAUAUUUUUCAUGUAAUUCUUAUUUUGUUUGGUAAGC

CAUUAUUCUCAGUGUGGGACAAAUCCAUAUGAACUGUGAUUACACAUCCUUAAGGCUAUUAAAGUCUUCUAAAGACUGUUUACAAAUUGUAGGUAC  
UUUAUGCAGGGAUGGAAACAGAGAUAACUGCCAAGCAAAAGAUUGUAUGCAUUAUAUUCUUUAUUCUCCUACAGGAUGAACUUUUGGUAUUUUUGU  
GAUUUUGUUUUGGGUUUUUUGUUGUUGUUGUUGUUUUCUUUUGAAGCCUCAAUUCUUCACAGAACUGUAGAAUAAACAAAACUGAGUUGGAAGGGACC  
UCUGGAGAUCAGCAAGUCUAGCCCCACUGCUAUAGCAGGUUCCGCACAGUAGGUUACAGGUAGGUUAGGGGAACAGUCCUUCUGUGUAAACUACG

>SYCP2. XM 015296671

>ZP2, NM 001039098

>G RTP1, XM 416941

>*GFRA1*, NM 205102

>HHIPL1, XM 421358

>UNK, XM 015295331

CCUCCCGAGGACGUUCAUUCUAAUACAUAUCAUAGAGAACUUUUAAACUUUAUACGUACGUACAUAUAUAUGUAUGUGUACAUAUAUAUAUGUAUGUGUAGUAUAUAUAUAUGUAUAUACGUGUGUAGUCGUGCGUGGUGUGUUAUGUGUAUGGAUUGGACACACAGCCACACACAAACAGAAAUUAGUUGCAGAGCACUUUGUAUAUUUAACAUCUUAACCGUGGCCCGCACCCGUAACUAUUACUACUCUUGAGGAACUUUGAGAGUGUUUUUAUAACAGAUACAAGGGCGCGUUUGCAAAGAGUCUGCGUUCUCCUCUUAUUUAUUAUGGUAUAACCAAUUUUGACUAUUCCAGAAAGGAUUUAGAGUGGGCGAGAGGGGCUUCCACGUGCUUUCAGAGGAAGAGUUGAGAUCAUGGGGGAGGAUCGAGGUGGAUUGAAAUGCCUGUUUCACGUCUUGGUUCCUCCUGCUCUAACUGACCCAGCGUUGUUAAGCGCUCUCCGCCUGAGGGGAGCUCUGCUGGGUGGCCUGGCCUGGCGGUCGAGCUUGCUAUCUCUAUGUGCAGAAUUUGUCUGCCUUGAAACAGCAAGUUCACUUUUAAAGUUUUUUAACUCUUUGUAUAUUUAUAGAAAGAAAGAAAGGGGAAAAAAUAUAUAUAUAUAUAUAUUGUAGCUAAAGCAAGCCAGGCCCCCCCAAUUCAGUGACCAAUAUAUCUUGUAUAGUACAGCUAACACGCUUGCAGGUUUGAGCAGCCUUUGGGUCAUCAUCCUUGCGUCAGCCGAAGCCCUUUGUGAAAGGGCAAUGGGUGCACAGGUCAGUUCUCUGCACACACCCC UUCAUUGGGUGGUGCGGCCAGAGAAUUCGUAACCUUUCAGACACAGAUUGGUUUUUCUUUAAGCCACAGAGAUUGUUUUGUAGUCAUCUGUGGAUCAGUGAAACAAUUGCAGACGCCUACAAGGACUCCUGACUUUUUGGACGUGUUGGCAUCCUGUUUCAGCAGCUAGGGGUGGCGUGGGCGUGCAAGUGCAGGAAGCCUCAUGCCAGGGAUGGUGUCAACCUGUGGUCAGAGAAAGCCCGCAUGGAACAAUCUGCUAUGAACCAUUGCAGCUGGAGG CUGGAGCUGGAGGGGAGCGUACAGUCCUUGCUCUCUGCGUCUCUAGGUAAGGGAUGCUUUCUCCUGCUCAGCACUGCGACACAAAACGCAGUGCGUGUUACCACUUCAGCUUAUAAACACAGCCACUGUUUGUACGUGUAUAUGAAAGAUUGUUGAUGGGGAAACUCUAAAGCUGGUUGUCUCAUGAUGCCCUUGUGGCAGUGAUUCCCAACUACAGUAUGUAUCAGAGAGGCUAAAGGAAGAGGCGUAAUUGCAGAUUCUAUUAGGAGGUUCUUAACUACUACGUCGUCUCUGCGGUGCUGAGUGUAGCGCGCGCGGUGUGCUGUGUGGCGUGUGUUGGUGCAGCGCAGGGGCGUAACCAAGCAGGGGAG



>EEF1E1. XM 418953

>TEKT1. XM 004946828

>TRIM36, XM 015280829

>ZAR1L, NM 001171543

```
>MOV10L1, XM 015273353
```

>MLIP, XM 015284903







>TFAP2C, XM 417497

>CYP26B1, XM 015286068

>*GDF3*, NM 205211

>SNRPB, NM 204599

>BMP8B. XM 003642583

>*TET1*, XM 025151680

[illegible]

UGAAUUGAACCCCAUUCUUUGUAUCUCAGUAAAAUUGUAAAAACGGGUAUGCUGCAAUUCUUAGUUCAGAGCUUAAUUUUAGUUCAAAUAGAGGA  
UAUGAAGGGAAUGUAAAUAUAUAAAACAAAUUAUUACACCAU..... (truncated)

>*RBPM52*, NM 204869

[illegible]

>MAEL, XM 004938325

[illegible]

>SNRNP35, NM 001277175

CUGGCAGCACCCTUGUCUUAAGGGGAUGAUGGGAAGCUUGGGUAUGGGUGACUAUUCUUUUUCUGUCUCUAGAGUAGUGUGAGACACACAGUACUGCCCU  
 UACUCUGGCUGGGGCAUACCUUCUGCUGCAUGGGUGAAUGAACUGGUAUGAAGAGGGUGAUGCAGCAGGUUCUGGAAAAAAGCUGUGCCUUCUGGAA  
 GAUGUGGAUGUGACUCAGUUGUAGAUGUCACCUUCAGCAUGGGGCGUGAGAGCUGUGUUA<sup>1</sup>CCCAAACAGCAGCAUUA<sup>2</sup>UGUUA<sup>3</sup>CUGUCUUGUGCCUU  
 UAGUCUUUUUACUCUGUAGAAAGCCUGUGAGUGGUGUCCUAGUCGAGUAUUCUUUUGUUGAAUUGUUCUUCAGAGAAUUAACCUUUUCUUAUUAUA  
 UUUUUAUUUGCUGAGUAAGAAAUACAUGUGUCUACCAUCCCAUG

>TDRD9, XM 025151084

GUAAUUGCUGGAAGUCUUUCACAGGGAAGAAAUAUUACAGCCAGUUCACAGAAUGUUCUGUCUUCUACAUAUAACCGUUAAGAAUGUGUUU CACAAGACU  
GUUCUUUAAACAUUAGUGUAAGUGUAUUAAAAGAUAGUUUGGUAUAUUUUUAUAUUAAAAGCCAGAGGUAAUACUGACCUCACAGCAGAUACAUAUGAUUU  
CAUAGAGCAGGAAGUCAGUUUUUCUGUAAUUAUUUCUGAGCUGGUUUUAUCAACAGGCUUGUAGAAAGGCCAAAUAUUAGCUUUAAUUUGUUCUAU  
UUCUGUCUGAAGUCUGAAGCCUGGCCUUUAUAUUAUAGUCUUGCAACUGACAGUGUACAUAUUUCUUUUUGUACUAUACUUUUUAUCUUUUUAGACCUA  
AAAGCUUGGGGAAGCUGAAUAUUUAGGUUGUAUUCCAAUUGAAAGUAUAACUUUAUAUGUCUGGUGCAAUUUUUCACUAUUUUUUCUCACACAAAA  
CAUAAUGCGUGGUUCUUUUUCUGUGUGGACGAGAAGAAUGCUUUUGAAUUAUCUGAUUCAUUGCACCUBUGUUU CAUCCUGUCUGUUUGUUU UUCUGAU  
UCGUGAGAUCUUUAGGUCUAAAAUAGAGGUCAGUGGUUUCAGAAUAAAAUGUAGAAGUGAAAUAUAAUUGGAUUUAUCUGUUCUGUUGUGCAGUCUGU  
CUAAUUAUAAAGCAUAAUUUAGUUACUGA

>CDYL, XM 418964

[illegible]

>*BRIX1*, NM 001031449

CCUAGAAGUUACAGUUGGAGAUGCACAAAGUCAUCUUUAGUCUUCUGAGCUAUAUCAAAUAUAACAUUUCUAGCUAUAUUGACAGAAUAUUGU  
GAAUACUUGUUUUCACAGGUGAAACUAAACUGGAUUUCAGUUCUAAGUAAACAAAGAUCAGUUUCUUUAUUGAAAAAAAAAAAAAAAAA

>SOX10, NM 204792

GGAAUGGGGAACAGUGACCAAAAGCAGCGACGGAAGGCCUCCGAAGAAUCUGCACAGGCAGAAGACCUCCGAACUCCGAGGUCACUCAGUGCCACCA  
UCCAGGCCACCAGCACCCACUGAGUAUCUGGAAGUGCCUUCUUGACCCCGGCUAUCGUUGGCUCACCCGCCUACAGAAAGGUUUUUCGUCUUUUCG

UGACCGAUCUCCUUGAAAUUACUAAAACAAAAGAACUGGAUUACUGAAUGUAAGCAAUGUUUGUGUUAUUUCAAUUACUGUACUUUCACACUGAUGU  
GCCACAUUCUGCCAGUGGCAUGCAGAAGCCUUUCACUGGAUCACUAGUUACGUAUAACUAAACACCACCACUCUUGAACCGUGCAUUUCUUCUUUAAAG  
CCAAAGUGGUGUUAACAAAGAUGUAAAAGAGCAUCUUAGGAAAAAGACAUUUGAACGCUCACUUUCUUUCUGAUAAAUUUUAUUCACGCUUUACACAC

>GPR149. NM 204662

>PRPF39, XM 003641432

>*DMRT1*, NM 001101831

>PRPF19. NM 001039331

>MAPKAPK2, XM 015299062

[illegible]

CCCGGCCUCCCGGCACUCUUCGUACUGUUUAUAUUAACAUCUCUCCUGCUCUUGGUGGCCCCUUCACGUGCUCGUGGCUCCGUUGCCCCCG  
UGCGUCCAGCCGUGCUGUCCCGGUGUUGUACCGUCUUAAGUGGCUUAAUAAUUUUUUAACAAGCCGAA

AGAUGGUGGAUCCUGGACUAGGUUUUUUUUUGUGAUGAACAAAGCUGGUCUAAACUCCAUAAGAGCACUGCAGGUCUAUGUGUCUGUAACCAUGGUG  
AUCAGAAACAGUUUUUAGCUAGUAUUUUUAAUUGGAUGCCUUUUAAAAAAGGAUAUUAGAAUAUAGCUCUUAUAUAUUUGGCAGCACUUUUAAU  
AAAUGUCUUUAUUACAUUCCUCUGAA

GAAAUAUGCAUCAGAUAAUAGAGAAUCACAUAAAGGACGCCUUUGGGGGAAAGGAUCGCUUGAGUCUACAGUCCAUUGGAGAGACCCUGGCA  
UGAGCAACCAAGCUGCUGCAAAAGGUUAUUUUGUACAAUUUUGUCUACAUUUUUAUCUGUUUAGUGUGCGCCUACAGUGGCAGAUUUUACAUUUUUAGU  
GCCAUUUUGUUGCUUGUAUUCAAAUUUCUGUAUUUAGUGAAGUGAACGACUACCGAUUUUAUUUUGGCUUGGUAUUUUGAGGUAAAUCUUAUUU  
CGUUUUUAUAUAGUGCUGACUUAUUUCAAUUUAGAAUUUAAACGGAUGGUAACUUGCGCCUUAUUUUAUACUAGAGGAGUGCAGCUCUUCUGUGCUGU  
GUAGCUAACUCUGACAGAAAGUAUCCUCUGAUUUUGUCUUAUCCUUAUUAAUAAUUUUCUGAAGGAAAAACAAAAACAAAAACCCUUAUUUAGAAUU  
UACUGUAAAUGCUUUUUUACUUUGAAUUUGAAUAGUAUCUCAAUUUGGUAGAAAUCUUUUUUCAGGUGACAGUUGAUUUUGAAGGAUUGUUUUUAU  
CAGACUCAUUUACAUCUUCUUCUUAUUGUAUUUUUGGUCACUAGCGCCGACGUUGUGAGCAGUUGAGUAUUGCUGGUUAGCGUUUAAGGUGGCUGUGU  
UGCAGUGCAGAGUGCUGGCUGUUUCCUGUUUCUCCUGAUUGCCUGUGUAACGAGUUGCCUUGUGUGAGAAAACAAUUGGCUUGCCAGUUAUUUA  
AAUUGCCUGACAAUCGCAUCUCCAAUACACCGGGCCUGUCAAUAAAAUAAACGGAGCAUACAGUGAGCAUCAUCAGCUAGGUAGGUUAACACCUUAUU  
UUUCCAGAAUGGUAAAUCUUGCCAACAUGCAUAUAUGAACUUAUAUUUGAGAAAUGUAUGUUUAGAAAGAAAUGGUCAUUCUUCUGUAAGUACU  
GAUUGUGUAUCUUUUGCUUUAAGACAUUUUGUACUUAUACCCACUGUCUCUGUAGUUAAUAUAAACUUAUUUUUUCUGUUUAACUUUUCUACAUAA  
UGUCUGAGUCAGCUUAUUUUAGCUUGAAAGAUUUUCUGCAAUUAUCUGUCAUUGUUUAACUUUAUUAAGUAACAGAAUGCAUUCUACUGCUUCU  
UAACUUUAUCCACUGGGGUUGCUUUUAAUUAUCUUGGCGAGACUUCUGGUUAUUGUGACUAACCCAAUUGCUGUAUGUAAGUAUUGCAACACGGC  
UCCAAACACCAAACUGGGUCUUGGAUGUUAUGGAGGAACACACUGAGCAGUAUAAUUGCUAUUUUGCUGUGCUUGUCUUAUUCAACAGGCUG  
CUGCUUAUUGGUAGCUCAUUUAGUGUAUUAUCUUUUUCUGAUUUUAUUUUUUUUUUUGGAUACCAAUGGAUUGUAUUGCUAAUACUACAU  
GUCACAGGGUUAUUGCAUAGGCCUUGUUAACUUUAUGCAUAUGUUAUAGUGAAUUGGAAACUUGAUUACUUGCAGCCUGGCGUGACAGGGAUUA  
AAGUGCUUUUUGCAACAAUCUGGAGGUUUUCUGUGUCCAGGACUGAGUGCAUAGCAGUCUACUAGAUAUUCAAUACAGGCGUGGAUUUUUGUA  
AAGAAUCUUAAGGAUAGAGCUUCAGUCUUCAGGAAACCAUUCUUAAGGAUACGUUUAUCUUUAAGAGAUUUGGAACUUUUUCUUUGAGCCGAG  
GUUGUGAAUUUAAGUUGGAUCUUGUGGAUUGCAGGUUGCUAUGUUGUGUAGUGGCCUACAUAAUGGAAUAGAGUCUCUUGAAACAUACUUGGUCU  
UUGGGAAGGAGAAACAAUUUCUCAAAGCCAUAGUUAACACAAUAAACAGAUUAUUUUUACAUGCAUGUUUAAGAGUAUCUGCUAACGGGGAUC  
UGCUUUUCCAAAACAUACAUGAGGUUUGCUGUAAAACAGACUGUUUCUGCAGAUCCAGCUAAAGUUAUUUAUACUUGUAUUGGAACCAACAGAGU  
GGAAUAAACUUUAAGUACCAUUGCUAAAACAAAAAATAAAAAAATAAAAAA

CGCAAUUCUGACGGCGGAAAAUUAUCAGUUUUAUUGACUAAAAAGCACAUAGUAUAGUAUGUAAUUUAGAAGGCAAUUGUUUCAUCUGAAUUUUAUUGAAUAAAAUUGGCUACUUUUAAAAAAAAAAAAAAAAAGAAAAAAAAAAAAAAAAA

UCCUGGAGGAGGAGAUGGUUUGAAUGCAGUGCUCGCGUUGCUGAAUAGGCGAUUCACUUGCAUUGGUCUUCUUCUUGGGGAUAUAUUGAAUCUU  
GUCUCAAGUUCUAUACGGAUCAGAAUACAGAAUUUUUGAUAAGCGAAGCGACUUCUUGGUCGAGCUCUUGUGGGGAAAGCCAUUGGCCUUUAUCCCA  
CUUUAAGGGUUAGAAAUUUUAUUCUAGUUCUCCAAGAGUGGUUAUAGAUGUUCUUAUACAUAUAAUUAUUGGACAAAGAAGUAUAG  
UGCUGUAUAAAUAUACGCAAAUAUUGUUAACUAGCCUACCUUCCUUUAUUGUAUGUACUUAACCCUACAGAAUUAUUGGAAAGGCCUUUCAAUAUUG  
CAAAACUUUUAUAAGAGCAUUA AAAUUGCAUUUUUGUUUGAUUAUGUAUUUAUUCAAUAAAGUAUUUUAUUAUGUGGAAGUGUGAUCUGGACCCUGUUG  
CUAAGCCCCAGCAAGCAAGCAUACAUCUAUUGUCUUAAGUUAAGGUUAAACCCAGUAAAAUUUGCCAUUAUGCACAUGUCUUAUUGAAGUUUGAAUG  
UUCAAUAAAAUACUUAUUAUUCACUU

AUCUGUGGCUGUCCUGUUCACGAGCCUCUAACACUGAGCUGUGCUGUGGGAUGAAGGCUGGUGCUACAGAGCUUCGAAAAAGAGAACGUACUUUCUGUCUGUCCCUAUCCUCUUAACUGUACUACUGAAACUUCUGGGUUUUUAAAUAACAUUUUAUAUUUUUAACAGUGUUUACAAGACUGAAAAAUUAACGUGAGGAGCUACUUGUAAGCAAAAAAGGAAAGCAUAUAUAACAUAUAAUCUAAUCAUGUUUGCUUUUAAAAGCUGUGCCAUCCCCUCUUGGUCUGAAGAGGAGCAUU

GCCCCCCC GCCCAACCAGGAGCCUCCA UCCACCCCGG GAGCAGGGGAUUGCCAAGGAUGG ACCGAGCGGGGGGUGACCCUGAGCCUGUGGGGU  
AUCUGGGG GUUGGGAGAUG

[illegible]

GUUCAGGUUUACCCUUAGUGCCUUCUUUAUGUUCAGAACUCCUCUAAUCUGAGACUGAAGAACUGUUAUUUCUGUCCUCUGGCCUAAAAAGUA  
AUUUUUCUGGUCAGCAUCCAAAUAUUAGUUCUGCAGCAAAAAAAAAAAAAAA

>EFTUD2, NM\_001031501

ACACAUCUCUGCUGAGCCAGCGAGCUCAGCAAGCCCAGCACUCCCCACCCUCAGCGCUCUCAGGUUGCUCUUGUAUGGCUGGAGAAACCUCUU  
GGGGUGUUUGUGCACC CGUGUCUCAGCGCCCGCCCGCACACAGCACAGCCCGGGGCACCAAUGCUUUGUGUGUUAUCAGAGCUCUGCGUGCAGUGA  
GGAGGUUUUCCUUUAGAUCCGUCUCUGCAGGCACACAGGUUGUAGUCUGGGCUGCAACGCAUCAGCUUGAGUCGAAUGUUUGGACUCUGGGGGUGU  
GAGGUUGCUGGAUCAGCUCUCCUGCUUUUGGUAUUGCUGCCCGUGGGUGCUCUGCCUUCUUGGGGCAGGUGCAGUGCGUGGGUGCCGUUCCUACCGA  
CCUCCCCAGGAAAAGGGCAAGUCUGGAUUUACCCUUUAUUUUUGUACAUGUUUUGGAUCCUGGUAACAUCGAAUACAGACUUCACCCAGAA  
AAAAAAAAAAAAAA

>SF3B1, XM\_421912

UCUUCUUGUUCUGUUGUUUGUGUUUAUUGCAGCUGUUCUUCACAUAAUGCUUCAGAUUUGAUGAUGUAAAAUUUUAAAAUUAUUGGAGAUGAGUA  
UAGAGCUGGGCAGAGGCAGAGGUAGGAUCCAGUAGCAUGAUUUUUAAAUAUGUCCUUGUUUUUGAUGUUAACAGUUAAAAGCCAGUAGUGACCA  
AGAAAACAGUGAUUACAGUAUACAGGAGGGAUUCAUUUUUGGUUCAUCUUUAUGAAGAUUUGAUUUCAUUCUUGUGUUUAAAGGGGUUGUUUUU  
UUGAGAAAUAACAUAUUGUGUAUAAAAUCUAAUUUGUGUGUUUUUGGACUGAGAGACUUGUAAAACGAGUCUCUGAUGGAUCUAGUAUUUGUU  
CAUGUAUUAUAGGUGGAGUCAAGCAUUUAAACCCUUUGUCAUCCCUAGCUUUUGAAUAAUAAGAAAAUAUACAAACUGUA

>SNRPD3, NM\_001007838

UUUUGGCCUUGACCAGUAUGCUUUUUUUUAUUAGAGGGGCUCUUAACUUGUCUACAUAUAUGUUGGUAACUUCUGUCUAAAAAUGUUUCUGACAAA  
GCCUUGUCUGUGUUUAUAGACAGAACUCCUCUAGACACACUAGAGUUCUGGCUUCUUCUGUAGCUGGCAAAUACAUGGAGGUUGAGUUUCAA  
GUGUGUUGUCUAGAAAACAGUGGACUUGAUUUCUGGAUUUGACUUCUUGUGGUUUUAUGUGAUGCAUUGAGUUUCAAAAGAUCAUCUUGCUUGCUU  
CUUGUUCAGUACUGCUGUUAUCUAAAGAAUUGAAGGCAUUCUUGAUGAAGAAUUUUAAAUGUUGUUUAAAGUUGUGUUAACAUUUCC  
AUUUACAGAACAAACAGCAACUGAAGCAGCUUCUAGAGAAGCUCAUAUGGAUCUAAUAAAUAACAGGUCCAUCUCAAAGCUGUAUUAUAGC  
UUGUAUUCUUGUAUUUCUUAUUUCUCUCUUGGAUGCAGCAAAAACUUAUCAUUAAGGAGCACACAACUAAUUAUUAGUAGACAGACCAUUUUAGCCU  
GAGUCUGUACUUGCCUGGGUGAUGUGAUUCUGGCUAUAUUGGCAGUUACUUGUUAUUUACCAUUGCCUGGGCAGAGAAGCCUGAAUUAUGGAAGAAA  
AAAAACAUAUUUCAAGCAUUGAUUUAGAAUGUUUCUUAUGAAUCUAAAAGAUUGUCUAGGAAAAGUCACAGAAAUGGUUAUCUUAUUUGUAGGCUGGC  
UUUUUGAACAACAAUCUAGACUGACUUUAGCUUUUGUUAACGUCUGUACACAAUCACAUAGUUAACAGCUCUACUGUAGGAGGCCAAAUUUAGUUG  
UAGCUUUAGCUUAUUUUUGCUUGAAGUACCAGUAGCUGUCUUAUCUGACAUUAUUGGUUGAAUUAUUUAUUUGAACUCUCCUGUACCUAUUUGUAC  
ACUUCCAUACAGUCAUCAGUCUAUACAUUGUAUGAAUGAGUCCUGCUUUUCUGCUCUGCUGUAUAAAGACCCCCUGUGUGCAGACAUGGAAGUUGAAC  
UAAUGUACUUAUUGUUGAAUUGUCUGUAAAUAAGCAGUGUUUGAUUAGCAAAAAAAAAAAAAAA

>SNRPG, NM\_001302092

UGGCAGAGGAACCCCAUAGUGACCUGACCCUGUUGUGUUUUUGUUUACUCACUCGAACCUAGUGAAGCAACCACAAGUGUAAGCUUAUUUUUUGUUA  
AUAAAUUUGUACUGGUUGAUGUA

>HSD17B1, NM\_204837

GCGCGGCCCGGCAAUAAAACCCUGUGCCCGCG

>SNRPB2, XM\_419331

CCAGACACUCUUUGGAAUUCUUUGUAUUUGAUUUUUUUUCCUUUUUAAUAUGAGAGUACAGCAUGUUUUCUGUCCUGUGCAGAAAAGUAAGACUGU  
UGUGUGAAAUGGCUGCAGCUGUCAGCACAGUUGCAAGACUUCUGGUAUCUACUGAAUAGUCACUUUUUGUGCUAAAAUACUAAUUUUUAUAAAAUA  
AAUUCAGCUUUUGCUGUUCUGAAA

>RNPC3, XM\_025153040

AACAUAGCAAAAGAAACAUUCCUGCGUAAAACUGCAGUAUACUGUCAUGCAGAGUGUAUCCUUUCUUGUUGUAUCCUUUUUUGUGCAAUGUUUCC  
CAUAGCACUCAACCACCUCUAACUUCACUUAAGAAUAGGUUUUGGGGAGGAGCUUAUGCAUUUUAAAGCCUGAAUUAUUAUCAAUUUAGAAAGCA  
GCACAUUUUCAGGGGGGAAAAAAGAGUUUUCUGUUGAGUGAAGCAUGAAUGCAAUGAACUUCCUAAUCUUAAAAGGUAGCUUACACCUUUCUCCU  
CAAAGGUCUAUAAUUUACUUAUUUCUGAUACAGUUCUUAUGCUUAUCUGAGCUAGAAGUGUUUACUGAUGUGUGUGGAGCUGUGCUGGGCUCAC  
UCUGAGGAUGUCAUCUUUAACUAAAUCUUAAGAAUAAUAGUUGGUUUAAAUAACGUCACAAAGCCAUAGAUUAAUUAUCAAGGGUUGAUGUGUU  
CUUAGAAUGUUUGAUUACUGUUGCCUACUGUAUGAGAAACUGUUGAUUUUACGUUUUGUACAUUUGUCUUUUGUUUUGAACAGAGCAAAUCCAAC  
AGUGUCUCACAAUGCAGUAAUAGAGUUCUAUACUGAUCUUAUAGUCACUGUUUACUUAUUUACUGUAAUUAAGCCAGUAUAGCCUGUACCUGCUAC  
GUCAGGUUUUUUUUUUUCAGAUACUCAGAGAAGUCUUAUAAUGUUAACCAUCUUUACAACUUAAGUUGUCAAAAGAAAGCAUGUCACUGAUAGGAUCUGG  
UUGUUAUGCUGGUAAACAGCCUUUGUGAUUUAUCCAGGUUCCUUUUGCGUUUACUCCCAUUAAGAGUUCUCAAGCCUGGGGAGGAAGCAGUACAAG  
CGUCAGGACUCUGGAACUGUGCGUAGAGCAUUUCUAAAAGUACUUGAGGCAGAGUAUAAAUUCCUUAUCUUAAGAUUCCAAGUAUGUUUGUCAGAA  
GGCUUAACUAGUAUAAUUAUGUUUGCUUUUGAAUUCUCUAAUAAUUAUUUCCUUUCUCUAA

>EIF4G1, XM\_015291529

GCAGCUGUGAGGAGGAGGAGGAGGAGGAGGAGGGGGGAGAGCAUGGGGCACCCUGGGGUGUGACUCCAUCCCCUCCAGCCUUGCCCCUGGACU  
UGCUCUAGCCGGGGCCGAGGGACUGCUGUGCCCCAGCAGCAGCAUCCCCUCUUUUUUAUUUCUCCUCUCCUCCUCCUCCUCCGCCCGGCUUCUG  
UCGGCCAGGCCUGUACUAGUUUGACAGAUAAUAAUUGGAUGCUGAUGGAGGCGGCGUCGUGUGGGUCUGCUCAGGCCCUUCUGUCCCCC  
CCUCCAGCACACUGUGUACCGGGAGCGGGGCGUGAGCCCCCAGGCUUAUGUCAUGGGGAGGGGGGUGAGAUGGGGAGGACGUCUCCCCCUC  
UCCCCCUCUCCUCCUCCGCCUCCUUGCUGAAUUAAGAGAGAUUAUUAUUAUUAUAAACUUAUUAUUUUGGUUUGGGGACAGGAGCGUGAU  
UUCUCCCCUCCUCCUCCUUAUUCUUAUUCUUAUUCUUAUUCUUAUUCUUAUUCUUAUUCUUAUUCUUAUUCUUAUUCUUAUUCUUAUUCUUAU  
UGCUAUGACACCGGGGAGGUGCCGGGGGAGGAGGGGGGAGGGGCGGGGGGAAUUGUGAGCCCUUUCUCUCUGGGCCAGGCGUAGUCCCCGUCC  
UCCCCCGUAGCCCCCAUCCUCCCCACCCCAAACUGUUUAGGCCACAAUUGGCCAAAGCGACGGGGCGGCCCGCAUCCGCGGCCCGUGAUUUUAUA  
GAGCACCGGAUGUGACGAGCCGACGUGUAUUUAUAAAACAAGGAUUCAAUAACUGG

>CWC27, XM\_424748



>SPDYA. XM 004940192

>TEX11, XM 025149940

>ZC3H13, XM 025146798

>TDRKH, XM 015280019

>SYF2, NM 001257294

>*CRNKL1*, XM 419315

>PLRG1, XM 420368

[illegible]



AUCGUAGUCAUCUACUUUGAAUAAAGCUGGCUUAAAAUUUUC

[illegible]

AGCAUCGUGATCGUGUCACUGCAGCCUAGACCAUAAGCCGUCACUCUGUCGUGUGGGUGCAUGGTGUUUCAAUUCUAUACAAUAAUGGGGAUCCUC  
UGUGAAUUCUUACAACGUGCAAAUUAACAUGCAACCCUUAACAACAUGCAAAUUAUGACGUCUUACUUAUGCAGCUACACAGCUGAAAUUCUAGAC  
UUAAGUACUUGUCUAGUUUCCAUAAGAUUAGCGAGUUCUUAUUUGGAGAAAAGUUUCCAGUUCUACAGACATGUUU<sup>1</sup>GAAAGCUCUACAUAACUG  
UUCUUUCCUGGGGUGGAAAAAGUUUAGUUCACUUAUCAGUACAUCUAGGACUGUGGAATTGUUU<sup>2</sup>GGAUUAAACAGUATGUUU<sup>3</sup>CUAAAAUAGAAUGCA  
AAGUGCAAAAUAAAUCUAAAGUACAAGCCCAAAAAACUAAAGAAACAGCAACAGGUAUUUGUCUAGAAUAAAGUUAAGGCCACUGATGUUU<sup>4</sup>UGAAAA  
GAGUGCUCCUCAAAAUACUGACUUCUACCAUUAGTGUUU<sup>5</sup>ACUGCCAGUGUAAAUAAGUUGAUGUUGACUAGCAUAAUGCGCAAAAUUAGGAUUGGUU  
CUGUCAAGGCCUUCUUGUUGUCAGAAUGACGAUUCUAAUAAAGAAUUGUUGAAUACACA

CACGUCGUGCCACCCUUGUCAUUUAAAGUAAUUGUUAUUUUCUAGUUAACCAUGGUAGUGCCGUAUGUUGAGCUGUGGGUGAACUAGAGAAGCCUUAUU  
UCCUCGCUUGCAGACACUGGGCAAGCUGAGCUCUGUGUCACUGUUAAGCUACUCAGAUUGUUAAGACAUCCAGAUUUUCAUUUAGUGCUUAGGGUU  
GGGUGGGGUGGGGGGCAAAAGGACUCUGAGGUGGGUCUGGGGAUCAGAUUGACAGAAUUCAGAGUCUGUUAUGUGAUCCCAUUGCACACUUU  
GAAUUAACAUUCUGCAAAAAACAAAAA

GGGGACACCCCAAAGCCGGCAAGAAACAUUGGUGCAGUUUUAUCAUAGCUACAGACCAAGCAGCAGAAAGCAGUAAUAAUAUUUUCGUACCACCUG  
AA

CAUUGCACUAGGAUGUCCUGUUCUUAUAAUCUAUCCUAAAGCAACAAAGUUUUCUUGUAUUCUGGCAGCAACAAUUUAAGCUCUGAAAGUCCUGUGAA  
UAUAAAGAGUAAGUUGUGGUUAAGUUGAGUGUUUUUAUGGAAGGGAAACACCCUUUUUGUUUUUAUCUGCUAGGAUGACUUGUACUUUGGUGUCUGAG  
AAAGAUCAGCGCCUGGUUUUAACUGUGGUCUGCAUUCUCAGUAAACAGUCUUCAGUCCUUUACUUGUGAAUUGGUCUGAGUGGUGGCCUUCUAC  
AGGUAGCAGCAGCAAGCCAAGUCACUUAUGAGCCGUGGAGCAAAUUCUGAUGGUUCCCAUUCUGUAUCCUGAUGUAGUGACAGUUUUAUUCUUAU  
GUUGAAUUUAGCUGAGCCUGAGUCCAGAAUUAACUUCUUCUUUGAUGCCUGGUUAGUUUACCUGAACCCUAGGACCUAUUUCAAUAGACUCGAUG  
GGCAGAUUUUAUGAUUUGGCUUUUGAAGGUGAUUUGCUUCUUUAUAUAAUGUGUAAUAGUAUGAAUUUGUUGCCAUUUUUGUGGUUUUAUAGCCAUGUU  
UGUGUGAAUUGCCUGAAUGUCUGGAUUAUUUCAGCAGCUAUUGUGAAAUACUAGCAUCUUUAUAAUACCUUGUUCAGUAUUUUUAGUAAAAUUUUUGUA  
CAGACUGA

AGCACA AAAUUCUUUAUCACUGAUGUAAUGUUUUUCAAGUAUGCAGAUACUUCUCCAGCAGCUUUUGCCAUCACUUGCAGAAAGCAAGCGUAGUC  
UGCUGUUUGCAUCUCAUCCACUUUUUUUCAUAUCCUGGACUAUUUCUGAUGCUGUAGGUUAUGAAUGGCUUCAUCAGGAUUUAAAAAAAAAAAAAAG  
GAUUGAAAUCUCCAACACUUCACUGUGGUUAUGAUUUUAACACGUCUUCAUUUACUAGGAUCAUCACAUUAUCCUGGUGUUUAUCAGUCUUAAGA  
UCUGUAAGGUAGAUGCCUGCAGAGUAAUGUCUUUUUGAAUUAACCGUGGAUUGUCGAAAAUAA

\_\_\_\_\_

UCAGCUGCAUGACCCAGAGCAGGCUGCAACGCAUUGCGACCCUUUUCUUUGGGGUAUUGCCCAAUGGCAGCCCCAGUGCCAAAGCCCUGCUCUGUCC  
CAUCCACCCUCCUCUCACUGCACACCCAGUGUUACUCAGUUGGACAAAUAAAGCUUAUUUUCACAG

**>ACR, XM\_003640318**

UUAGCUGCAUGACCCAGAGCAGGCUGCAAGUCAUUGCGACCCUUUUCUUUGGGGUAUUGCCCAAUGGCAGCCCCAGUACCAAAGCCCUGCUCUGUCC  
CAUCCACCCUCCUCUUGACUGCACACCCAGUGUUACUCAGUUGGACAAAUAAAGCUUAUUUUCACAGCUA

**>SNW1, XM\_421294**

GUGCCUCUGUACCUCGAGUAGCAAAGAAUUGGACUACAAGCUUGGACUUAUUUAAAAAAAAAAGGCGUUUUAAUUCAGAGAGGUAAUUAAGGG  
UGAUGUCAUGUAAAAGAAGCAGUUCAGAACUCUUGUGCUGUGUGGAGAUUGCAUUCACACACUAGUUCUUAUGAAGGACAGCUACCUAUGAAGAG  
UGGAAGAAAGGAGACCACUUGGAAAUUUUUGCCAGGGGAACUGUUCUACAGCAGCUACUCUGACUUUGCUAAUUCUCCUGUUGCCAGCAUCUCAGGG  
UAAGAAUGUAGCCCCUCCACCGCCACAGUUUAUUUAAAGUAGCUGAAGCGUUUAUUUCAUUGUUUACGAGCUCUCCACUGUAAAUAUUUACUGUC  
UCAUGCUGUAAUAGAUGCUUGAGAGCUUCUACCCGUGUUUCUGUGUCGUUCAUGUUUAUUUGAACAAAGGAAGGGAAGCAGCUGGAUUCUGUUUUA  
AAUCCAAUACUCACAGUUUCUCAUAAUUCUUUAUUUCAGUUUCUUUACAUUUAGUGAAUAAAGCCUUCUUCCACAGUUAUUCACGUU

**>TDRD5, XM\_025153194**

GAAGAGGUGAGAGAAGCAGAUGGAGCUGCUGCUGAGGGAAGGCCUCCAUGGAGCAGUGAAAUAUUACCAUGCUGUCAUUUUUAAUUAAGACACU  
UAUUGUUUUGAAAACUUGAGACAUCUUCUCAGACGUGCCAGUGCCUGUAGCACAUGUUUAGUUGAGGAAAAUACUUGUUUUCUUGUAC  
UGGUGUUGUACUGCUUAUUGUCUUUAUAGAUUCAGAAGAACA

**>RNF17, XM\_015279441**

AAUCAUUUGUUCUCAUUGUCUGUACCAGUGGUUCUCAGACCAAAGUCUGUGAUUGUGUGUGAAUGUCCAUCAGUCAAAACGUGAAACACAUCAGAGG  
GCAGCUUUGCAGUAUGUGUUUACUACAGCGAAUACUGAAGGACUGCUUCGUUCUGUUUUUGGAGGGCUGGAUGGUUUUGUUUAAUUAACUCAUG  
UUGCAUAGUUCUUUUUCCUCCAUUUAUUAAGCACUCUUUUAUCUCUGCUUGUUUUCUAGUUCUUAUUCUUUAGAAUUAAGUGAAUUUAUUCUAAA  
UCACUUUUGACCUUAAAGCCUUAAGUAUUGUUCUACAACAGUUUUUGUGAGAGCAGAUUGGAAGGAUUGCGCAGUAGUGAAGAAAUAAGAUACAGAAC  
UAUUGUUGGGCAGUUGUUCUCAUUGUAAUAGGUGAAGGGGAUGAUAAUGCUAUGGUGUGUAAUAGUUUAUUUCAGGCAUAAUUGAUGACAAUG  
CUGCAGUACUGGAGUCUGGAACUAGGCAUGAACAGGUGGGGAGAGGGGAACGUUGCUGCUGCUGUGUUUAAUUGCAUUGUUGUAUUUUGGUUUC  
AGUAUGAGAUGGAUCUGUUUUGUUCAUUGUGGCACCUCUCCUCCUCCUAGCUGCAGCAUUCAGUUGAAAGUGUUUAGAAUAAAGAGGAGCUGUUC  
CAGCAUGAAA

**>TEKT3, XM\_015295251**

GCUGGGAGCUGGCCCCAGACGUCUGCGGGAGAUGUUCUCAGCUUUGCUGAGGAUGACUAAAAUCCACGACCACUCUCCUGAUGAAAAUCCUGAGU  
AGAAAAUUAUUUGUUUGCUUUGUGUGUUU

**>NR6A1, XM\_015279582**

GCCCAGCUUGCCCCCGGGCCGUGCCUUAUCUCUGGCCUCAGGCAGGGAGCGGGCUCACCUCAGAGGAUGGGGGAAACAUCAUAGGCAGGAGGGA  
AGUGCUGAGACUGGCAGCGGGUGUCCCGGCCAUUGUAGCAAGAGUCUUUUGUUUUUGUUUUUGUUUUUUUUUUUACUCUUUUUCCUUA  
UAUAUUUAUUUCACGACAGAGUUGAAUGUAUGAUCUUAACACGAUGCACAUGGUUUCUGUAUGAAUGCAGCAGAUUCUCCAGCAGUUUACAGA  
AUGUGAAGAUGUUUAAAGUUGCAGUGUUUUGUUUAGGGUUAGUUCUUUUGUAUUUUGGGGCGGGGACUGAGAUGAUUAGACUACCUCUAGGAGAAGA  
UGCUGUUCGCGCACACUUCUCCUCCAUUGUAUUUGUAUCCAGAAGUGUUUGUCAUAGAAUGCAAACUGCCUACCUCAUUGACAGAGCUGUCAGUAUCC  
AAAUGGACAUUUUUGGAAAAGGGGGUGUUUAGAGAAGUCCAAAGCUUUUUCUGUUUUGUUUAAAACCUAAAAAAAACCCUAAAAAAAACCCU  
AAAAAAAACCUUAAAGAAAAAAGAGCUAAAAAAGAAAAGACAGGGAGCGGAGAAGAAAGGGAAGAAAGGGAAGUCUGUCUGGCCAGUAGGUUUC  
UUUCCUCCAGCAGUUUCCAGGUGCAGGUGGUUAUUGCCUGCGGUUUUCUGAAUCCUGCCACCAGAUUCUGCAGGGCUCUCCAGCCAAGAGGGCUCUC  
ACCCCAUUCUCCGGCUGCAUCUGUGGGAUGGUGAGCUGCUUCCUCCUGACUCCUCCAGCUGGGGCGUGCCACUGUUGCUGCAACACCUUUUUGUU  
GAUUGAAACUGUGCUGUUGCAGUGUAGCAGGCUCCAGCAUGGCAGCAGUAAGGUACUCUUGCUGAGAGAGUGAGAGCUGUAAAUAUUUUAUUUG  
CUUCCUUAACAUCCAUUUUAGGUUCAUAAAAACAGGAAAAGCCUACUGAGGGGAAGAGGCAGGGCUGCCCCUUUAGUGUAUUCCCCAAGAUUGCAU  
UGACUACUGAGGAGACUUCUGCAUUGCAGCCAUCAGAAGCGGCUCAUUCUGGGAACUGCUAACUUAUCCUGCAGUGAAAUGCAGCCUGCAUAAUGG  
UGAGAAGAGCAUCCAGGACUCCUGGUUUGGUAUGGCUUUCUCUGCUGGACUGCGGGAGUGCAUGAUCCAUGAUUGUAUCCUCCAGGACAGUUUAUUGUU  
UAGUGGAUCCCUUCUUAACCAGGAAAAAUUGGUUAGACUACAGAAUUGGUGAGCUGUUUGUCCAGGUGUUGCAAGGCUUGAGUUUCCAUUCUAGC  
AACCUCCACACCACUUCAGUGCGUGGAGGAAUGGCUUAUAGACAGCCAGUUAGCUGUCUGAGUAAUUGCUCUAAUCCUGGCUGUUGUCUCAGUUUGAA  
UAUCCCGUGGGUAAUUCACGGUGUCCUCCAUAGUGGUGUGGGGAGUUAGAGGGCAGGUGCUCUUAUUCUGAUUUCCUCCAUUAGCUUAGGAAGA  
CAGAGUACUCCUAGGGCCGUGUACCCUGGCUGGACUCUUUCCUGUGUCCUUAUCUGUGAUUUUUGAAUGCUGUUUUAUAAAUAUUUGGGAAC  
AACUUCUGUUUGCUCAGGGCAGGAGGAUCCAGUUGCUCCUUCUGUCUUGUCCUGAUAAACAGCUGUAUUAUUGCUGAGAAGUACUGACGCUGCUAAU  
AGAUGAAGAUGAAUGUGACGGUGAAUGCGAGAAAAAUUGUUGUACCAAAGUACUUCUCCUCCUGCACUCAUUCAGUUGAAGCCCAAGAGCCCU  
UGUGAGACUGGCUUGGCACUCUCUGGGUUGAGUCAGCAGCGAUGCGGGGCACCGGGUGCUGCCUGGAAGCCUUGGCUGCUCAGUGGGGUGCCCCUG  
GAGGCGUGCUGGCUAACAGAAGGCCUUGGCAGCACUGUGUUUUGGAAUUCUGCCUGGGGAUCUCCAGCUCGAUGGUUUCCUUAUUUUA  
AGUCCACUGCUGUUAUUUUUACUAUUUUGAAUACGAUGUUUACGGGUAACAGCUGCGGGACCGAGCAGUUCAGUCUGUAAGAGCUUACAAAAU  
CCAAAGUUUGGUUCUGUAAAUUCUAUUUACAUAUUUCUGACUGUAGAAUGAGACAAGCACAUUUUCUCAGGAAGGCCUUCUGCAUACGUCGUAUACCU  
CAAGUGUAAAUGGGAAGAUUUUAGUAUAUUGUUUUAAGUUAGAAAGUAUUUCUUCGCUUUUAACUUAUUCUCCAAUAGUUUGAUUAUGAUUCUU  
UUUUUACGGGUUAUCUUCUGACUUGCUGUUCUAUACUCUCAAAGAAUUGUUUAAUCGAAUAGGAAUUAUUUUCUGCAUACCAACUUGUGUA  
UCUGCUGAUGAAUGAGUGUAUUGUUUAUUAAGUGUAUAAAGCAGUACUUAUUGGCAACACCCCAAGGCAUUCUGUUUGUUUUAUUCUGAG  
UUUAUCCAAAGUGCUCUCCGAGACUAUGCUGUACCAAUAUAGAAACCCUUAUUUUAUUAAGGAUGACAAAUGGACAACACGUGUUCUUUCUGUUGUA  
UACACCAAUUAUUUGUAAAGGUGCAUUGGCAGCAUUUACUGUAGGGAGUAGAAGAUCCUUAACUAAACUGACAAGUAAGGGAGAGCUAAUUAUACCAA  
CCGAACGUAAACUCACUGGACAGUAUUCUUAUACCUCCUGCACCAGUCCUCAAUAGACUUGUAUUUUUAAACAGGGUAAGUGAAUGUGUUGC  
UUUGCAAACUCAGGUAAUUAUGAAGAGGUAGGAUUGUAGCUAGAAUUGUAGAGACGUUA..... (truncated)

**>MOS, NM\_001031516 (3'UTR is not known)**

**>SUPT20H, NM\_001006275**

AAGGAAAAGAGGCACACCUGCCCCUCCAAAACUCCUGAGACUUGCUUUUUUUUUCUCCUACAGUAUAAAAUAGAUUUGAAGGUGAUUCUUCUUUCC  
CUGUUCAAAAAGGAUAAAGCUUAAAAACAAUACAGUUUUAUAGUACUGUUGGGAAACUGAACUUUUGACAUUACACUGAAAAAAGAUAGAACUUG

GAAGCCAACCCUACGUAAACAGUGAGUUCAUCAGUAAAGCAGCUGGGGUCUGGCUUCCUUAAGUCACUUAUUUUUUAACAGAAUGUUUAUCUUGUAUUUUUUAACCAUUCAGCAGCAUUGUACAUAAGUAAAAGGGUGAAGACAUUUUAGAAGAAAAUGAACUUUGUAAAUGUAGUAUUAGUAUUUUUUUAGUAUUAUUUAGUAACACCGUAACAAUACAUUUUUAUAAAUCCAAAAA

>NAA38, XM\_025142148

CUGGUGAUGGACCCAGCCAUGCAAAAUAGACCACCGGAAUUGCAAUCCCCUCAGCCCCAGCAGAGCCCCGUCGUGGCCGCACUGUACCACGCGAU GCCGUCAUUCAGUCCCGUGCAAAACAGGACACAGAUGCCCCUCCUCCCCAAACACUCCGUUUUCAGCCUGAAACAGAGUUGUGCAGGUUAAUUU AAUCUCAGGAACAAAAGUUUAGUGGGCGAGAGGGCGGAAGGAACACACAGCAUUCUGGUCCCUUACUGCGAUAAAUGCUGCGGCCAAGG GGGGUCAGGGAGGAACAGGACUGAAGGGGGGAGGUUGCACAGCGGGUCUGGGGCAGCCCCAGGGUUCCACAGGGCAGCCACCGUGUGGGGAGGAGU GGGAGGGGGCCGCUAUGGGGCGUCCCCCCAGGUUGCAGUGACACUGAGACACAGCCCCAGCAAGGACACCCAGGGACCUGCACCGGGAGUCG GGAACCCAGAGCCGCCUCCCCCCCCAGUAAAGCAGAUCAUUUACAAAUAACAGAUCCCCAAAUGCCCCCAGGGACAGUUUUCGGUUGAAAUUCG GGAAGGGUCUGUCCAGCUCGCCCGCCUCCAAGGUCCCUUAUUGCUUUGUGGGUAGGGAGUGGUGGCAGAACCCACCCAGAGCCCCCGUGUUGU GUGGGGCGUGCAGACCCCCUUCACAUUGUCGGGAAUUGGGGACUGAACCCUCCCCUUGCACAGAUGAGGGUACUGGGGACCCCCCGCACG GUGGGGUCCCCAGUUUCCUCUCUACUCUGCUCUUGUGAGGCCCAUCUGGAGUACUGUAUCCAGGUUUGGAGCCCCAGGACAAGAAAGACAGAGA GCUGUUGGAGAGGGUCCAGAGGAGGGCCACGAAGAUAGUGGGGGCUGGAGCACCUCUUACAAAGACAGGCUGAGGGAGCUGGGCUUAUUGAGCC UGGAGAAGAGAAAGCUGAGGGUACCUAUGCAGCCUUAAGGCUUUCAGUACCUAAGAGGACCUUAUAAACAGAAGGGAGUAAACUCUUUGAAAGGCUAGG UAACAGCAGGACAAGGGGAGCGGUUUUAGUUAGAAAGAGGGAAGAUUAGGUUGGAUUGGGGAAGUUCUUUACCAGGAGAGCGGUGAGGUGC UGGAAACAGCUGCCAGAAAGGUUGUAGAUUGCGCGUCCUGGAGGUGUUGAAGGCUGGGUUGGAUUGGGGCCUGGGCAGCCUGGUCUAGUAAUUGG GAGGUUGGUGAGAUUCGUAUCCUUGAGGUCCUCCAACCCAGGCCAUUCUGUUGUUGGGGGCAACAAAGCUUCUGCGAUAGCGGGAA GAGUUGAAGACUGAUUUCUACAACAAAGGUCUGUGUCUUGUGAAGAGAUAUUUAACUUAUUUAUCACUUUA

>FUT4, NM\_001031487 (3' UTR is not known)

>SF3B3, XM\_001232347

GCAGCAGCUGGCAGGAGCAGAGCUUCUUGCUGGGCUCCUAUGGACACUCUCCAAGCAGACAGUUGGAAGGAGGAAUGUGUUAUUUCCCUUUUUC UAAAUACUGAUUUGCUCCUCUUGGUUUUAUCUUUCAAAGUAAUGCGAUUGCUCCGGUAAAUAACAGUAUACAGAUAGUAGGUCUCCAGCACAUCCAC UGCUUAUGUGAAGGCUCGUGCUAUCCUGGGUCCAGCCAGGGAUUCUCUUGGGAAUUAACCAAGGAAGGAUGUGAUCUGACCCUUGGCCCCAUCC CUGGAUCAGCUCCUCAGUGUCCUUAACCCUUAAGGCCGAGGGAGGCCAAGGGUGACUUGUCCUGGCCGUGCAGAAAGCACAAAGGGGUGGAUCGGGC UGAGCUUCUGUAGGACCAGAUGGGUUCUCCAUUCUUUGGUAAGGAACAGCUUUGUCCUGACGGAGAGCUGCUGGGUCCUUUCAAUAGUGGG AGGGCAGAGGUUAGGGUUAACGAGCCUGGGGGAGUCGGGCUUGGGGAGGGUGCACUGCCAUGCAUGUCCCCAGUGUUGCCUUUUGAACAGCGAGG GAGUUUUGGGCUCACCAUGUCUGACUUCUGUAAAUAAGAGUUUUGUACAAGUUGUCUUCUUGGGGGCAGGGAAGAGCAAGGCCUGAGUCUG GGACUUGAUUUAUAUAACUUUGGCAAGAGCAGUGUCUCCAAGCUGUGACCGAGUAGCACAUAGAAGAAUAAAAGCCUUAUAACUA

>HOXB4, NM\_205293

CUAUUCCUGGAGGAUUUCAGGGCCCGUUGUCGUAUGGCAGUGCCGGAGGUGGGGGUGAAUUUUUGCUGCUGCAAUCUCCGAGACCGUCUGG GGA AAAAGCACCCGGAGUUCGACCAGAAUCUUCAGGGGAAUAUAUAUACUAAUAU

>RAN, NM\_205258

GGGAUGAAGCUGGAGCCAGCGUCAGAAGUCUAGUUUUUAUAGGCAACUGUCCUGUGAUGUCAGUGGUGCAGCGUGCCACUUUAUUAUCUAGCU GAGCAGAAACUUGUCUUAUUCUUUGGGAUGCUGAAAGAGAUGAAUGGCUUCCGGAGUGAAUGUGGCAGUUCAAAAACAAAAACACAACAAACUUC AUAAUUUUGGACCUGCAUUAUUAGCUUGUUUUGGACUGCAAUAUCUCCCUUUGAGUUUCAAUAUAAGACUGCUGCAGUCACAUCAAAGUGUA UUGGGUAAAUCUUGUUCUGUCAUCCCAUUCUUUUUUUUUAGAUAAUAAAGUUGUAUUUCAAAUAUCUCUA

>WDR31, XM\_004945764

CUGUAGGAUCCUCCAGCACAGAUUGUCCUGGGGAUCUGAUCCCCAAAUUCUCCACUGACAGCAGGCACUGGGUGACCUCACGCCUGCAGAGCA GUGAGCUGCAGUGCACAGGGGAUACAUUGCUUACUGGUUGCUUGUGGGUGGUGGGAUGCAGUUAAGAGCUGGCUAGAAGAAAAGCUGAACCAGUGUUG CAUUCAGGCCAAAUUCACUCCUGAAGAGUGCUGUGGGCUGAAGUCACAAAGCUUCCACACAACCUGACUGUAAAGGGAGCCAGCAGAGGAGAAU GAGCUAUAAGAAAGCACGUGGCCAUUCUGUGCUAGGUCUGAGGUCUACAGAGAAACUCCUUGCACACAGGAAGCUGCUUUUACUGU GAAAAGAAGGAACAACCAAGCUGGGACUUCACUACUGUGAGAAGAAACCAGGGAUCAAUGUCUCCUGGAUCAGAUUUAAUACAGAUUGCUGAGC CAGCUCACAGCACAGUGCCUCCAGAGGACUGCAGGGGAUGAACAGUGUACAUUUAACUGCUGGACGACUGGCUCUCCAGUUCUGCAGCAGAUAAUCUC UGGCCUGUGUGGUCCCAAGCAGCAGCUCUGCAGCAUGCCAGGGCAUCGGGCAGGGAAUGCUCAGCCUCCUCCUUGCUCUCCAGUUCUUAUCCUGCU GAAUGGGGCGUAGCGAAUGUAAAUGCAGUUAUUGGUUCCAAACAUUUAUCCUUAAGCCAGCUAGAAGUAUGCUGCUGGCCAGGUGGGAGCAGGAC AGGCACUGGGUAAGAAUUGGCAGCCUGCUGAGAAACACCCAGGAGUUGUCCCUUAUGGGCAGGGAGAUUCCUGUCUGGACGUGGCAGCAUGCA GACCCUUCAAUAGAUACCUGAGAAGGGGCUUGAGCACAUAGCUGGAUUAUUAAGGCUUACACAAGAGAACACAGCAAUAAUACGGUUUUUGUGC UAUUUCUGG

>GNB2L1, NM\_001004378

GGAUGUGGUAAAAACACAGAUUUUAUGCACAAAACUCAAUAAAAGAGCGCUCGAGCUCAGCUCAUUGGCUGCAUUAUACCA

>EIF4E1B, XM\_015293879

GAUUGGGGUGGUGGGAGCAUGGGGGGAGCGGGACCCCCUUGCCGACCCACAAUGAAGGCUUCAGCUC

>SRSF7L, NM\_001031368

AGGAGGAACACACAUCUGAAAGAAUGGAUUAAGUUAAGGUUAAAGUUAAGAAGAAGAUUUUUUACAUUAUUUAAGGGAUUUUGUG GUGUCUUUAUAAGCAAGGGCUUAGUCCUAGAAGGUUAUUGCCUAACAACAGGCAUGAAUUUGGAUCUUUAAAAGUAGACUAAUGCAAA ACUCCUUUUGUGUUAUGUUCAGUGAUCUGGAAUAUAGGGCUUUUUGUAUUUGGUGCAUUGGAUAAACAGUGCAUUUCUACUAAAAA AAAAA

>SRSF3, NM\_001195554

GACUUUGAGAAGGAGCUGUGUACAGGAAGUCGUUAGAUCAGUACGGGGAGUAUGUACAGAACAUUUGGAUUUUAUAAAGCUUGGU GCAUUUUUAAAUAUAGCUGUGAUCUUGCUUUGUUAUCUUGUAACAGGUGGCAAAUGUAAAGAUGUGAAUCUGUAUAUGGUUCUAG

CAGAUCAUUGAAUUGUAAUUAUACACUUUUUACAUGUACCCUUACACUUAUUGUUUGUUUGAAUGGUUACCAGUUUGUCUUUGCAUAGAUAA  
UGUUUCUGAUCUUUGACAUUGUGCAGUAUGUGAUUGCUGGGGUUCAGCCUGGGGGGGUGUGUGCAGCAAAGUUGUUUGUUGCAGAGUGGGUGGCUGUG  
AGUGGUGGUGGUGCAGGAAAGGUGUAGGUGCUGCAUAGUGCAGUACCAGCAGUCACAUUGAGCCAGCGGUGGAAAGGAACGAGCAAGCUGCUGUUUA  
CCCACAGCUGUAUUCUGACUUGGAUUUACCUGGAACAGAGCUCCUUUGUAUUUAUGAUUAUACA AUUUUAUAGCUUGUAGGGGUCAGUUAAUUUUUGUACU  
UCAUGUGACUAGAGUGCUUAAAUAUAUCUAGCUUGACC AUUAUCCAGGACCUCUGAAUAGACCAAUACACAGCAGAACUGACAACUGGAGUGGA  
UGUGUUGACUUUGUAAUGGUACA UUGUAAAAGUUGGAAUUAACA UUUUCUUUACUGUACAAGAAUUUUAUGUCACUUGUAAAAUGUCUUUUUGUGA  
GAUCCUUGGGAUUAAGUUUUUGGUUACAACUUGU

**>RBM44, XM\_025152392**

GUUUUCUAGCCUACAAGAACACAGGUGUGAAUUUAUCUAGCUGUGUAGCCUGACUAGGAGAACUCCUAGGAACCUCUCCUGCAUAAAAAGUAAGA  
GAAUGAAUACACCAAACAACAAUUUCUAAAAGAUUAACUGUUGCUGCAGAACGUCUGUAAGCAGAGGAGCUUGCUAGCUCUGGCCUUUAUCAAACUG  
GGUACGACGGGGGCUUUUAUUUAGCAGGUUGAUUGAUUACUAGUGGAGUACGUUAUCAAUUGUUCUGGGCAAAGCUGACAUCAAUUGGCCAGUUC  
CUGUGUAGCAUUUACACAGAGGAAUCCAGUACAGGCUCAAUACUGGUUAAAAACCUGGUGAUUUUCUUCUGUUGUAUGGUUUUAUUUCUGGUGUAGA  
UAUUGAACAGAAUAAGUUUGUACGUCCUCUAGUUUUUGCAUGUUGAAGGACUUCUGUAGACAGUUCUUCUUCUACUUGCUUGCCUGGAAUUCUUGC  
AUUGUUUCUCCCUUGGCAGAGUUAGCCCAGAGUUGGACAUCUCAAUGUUUAUACAUCUGUAUAUUUGUUAAGAGGGAAGUAGGCCUGUGCUGAA  
AGCACC AUCCGGGAAACGCAUGGAGCCCGUUCACUUCUAAAUGGUGACUUGAUGACUUUGAAUUAACUCGGGUGAUUCACAAA AUUACCUCUGGAUGU  
GAUCUGUUAACACAAGGACUAUUUUUAUUUAUCGUAAUAACUUUCUGUGCAGUUCUCAGGGCUGGGAAAUGUCGCUCUUGUGUGCAAAUUCUGCCU  
UCCAUAAGCAAAGCAGUACAGCCUCUAGUGGUGCUCUGGGAUGCUGACAUUGCUGAUGUUUUUGUUUCACGUUACACGUGUUCAGGCCAAACUUAUUC  
UGUUUUUUAACUUUUUCUUUCUUAUGUAGAUAAUUAUGAAGAAUUGAACUCUUCACAUGACAGAUUUUUGCAGUCCAGCUCGCUCUGGGAUUGU  
UCUGUAUUUCUGUUUGUUUGGUAAGGCCUUCAUUGAACACUCGCUUAGCACUGCUGUAUGGUUUUGCAGUUCUGUUUGACAGAAACAUAAGCCCA  
AAGGUCUUUUGAGAGUGGCUUUUUGUGCAGGCAGAUUUUAAGUAAUUCUCCAGUUUUGUUGUUCUGUGUAGUUCAGUGUACUUCUCUGAGGUUGA  
AGGCUCUCCAUUUUACGACAGUGAGUCUCCUCUUAUAGCAGCAGGACUUCUCUGCUGAAGCACACAACCCCCGGCUCUUGGUGCCACUCCGUGUCA  
GGCAGGGUGAUAGCUGCAGUGCUAAACAACAGCCAGCAUGCUUACACGCUUCCAGAUAGCAGAUUCCAAAUAUUGUGCAGAAAUGUCAAGUAUCCUU  
UUCAUUAACAAGGCAGGGGAGGAGGCAGCAAGGGCCGGCUUGGAGAACAACAGUGCUGGCGGUGUGGUUACGUAAAGCCUUGUGCAGUGGCUG  
CUCCGAGCAGAGCUGUGCCCUAGAGAGCUGGGCCUCUAAGCCUCCUUCGGGUCCUAUAGCACAGCACAGGGGAAAGCCUCUCCACCCAGACUCUCC  
CUGAGAUUCUGCUUUGGGUUGAUACGGGAGCACUCAGCCUUUGUUUGCCUGUGGAGCUGCUCUCCGGCGUUCUACAUCUUCUUGGCCAUGGAAGGA  
GAGGCAGCUUAGGUGUGGCCUGCCUGAAGCUGAGGGGAGCUGACUGAUGGUCGUGAUAGGCUGUGUGCUGCAUACCACACUGCAUCGCUGU  
CCACCUCUGUCCCUUGGCUGUUUGCCUAGCUCUUGGCUGCCCGUGCUGCUGAAAGCAGCCUUAACCGUAAUAAAGGUUGAGAUGCUUUUCUUA  
CA

**>RPS6, NM\_205225**

AGAUGUACAUGAUACUGAAAAUAAAACCCUUUUGUGUUUAUUUUACUGUGAGACUUCACAGUGAAUAUAUUUCCUGGCUAUGUCUUAAAAUAAAUG  
GUAGUCCAGACUAAAAAAAAAAAAAAAA

**>DZIP1L, XM\_015277142**

GCUCAACAUGCCCCAGAGCCAGCCACCCACCAGUAAGCUCAGGUGCCUGAAGUGACCCGGAGGCCUUCUGGAGGACCUGGCCACAAGUCCAGU  
GGCUGGUGACACACAAGGGACCAACACCUUGGUUACCAUUCAGCCAAGCACCCGUGCAAAGGGACACUUGGUGCUAAUGAGGAAAAGGGAGUCCUCUG  
CUAGCAGCCACUGGAUGGUGCCACAAGACCAGGAACGAGCUGCAACAGCAUCCUACAGUUGCAGGAGCCUUCAGAGCCCCACCUAGUCCCUCCUC  
CCUUCUUGAAUCAGUGGGAACCACGACCCAAUGGAUGACA AUUCUGCACAUAACAACACCCAGCAAGGCUGGCUCUGUUAUGCCCAUCGGGA  
GAAAUGAAGCCAGUUUUUCCAAACUGUAUACUUUUCUAGCAUUCUUGCUUUUCCAUUUUUUGGAAAAAAACAACCUUCUAGCUGCUCUCCUGUUU  
UCAGCACAUUCCACCUUACAGCUCAAACAUAUAUAAUUCUUAUUAUAGCUGCAAACA AUUGCAAGCCCAUUAUACGUGGCAGGGAUAAGGAAGCCCA  
GACAGGUUGGGCAGAAUAGGGUGAAUUCUUUAAGUUGAUCAAAUGGCAAAAGUGCUUUCAGAUAAACAGUCUGCACCAACAUGUCCCCAGGGAU  
GUAUGCACUCAGCUGCGUGCCUUAUGCACUCCCAUAUAUGUCUGUCUGGUGCAUACCUUAAGAGGGAAACGUUCCAUUUUAUCCUUAAGUUGA  
AAUAAGAGCAGUACCUGGUCUGUAUUAUUUGUUAACAGUCUACUGCCAGAUUGUUAUUGGGUCACUUAACAUAUGAUUUUUCUUUUGGGUGAA  
CGUAACCCGUAGUGAGCGCUGCUUUUAUGAAUUAUUAUACAAGAUUGGAUUCUACCUCA
